# Supplementary material for: Hydroacoustic Observations of Two Contrasted Seismic Swarms along the Southwest Indian Ridge in 2018
Source: MDPI journal article supplement (doi:10.3390/geosciences11060225), 2021-05-24
Supplement: s1 [file s1]

*Supplementary Material*

# Hydroacoustic Observations of Two Contrasted Seismic Swarms Along the Southwest Indian Ridge in 2018

Vaibhav V. Ingale, Sara Bazin and Jean-Yves Royer

University of Brest & CNRS, Laboratoire Geosciences Ocean, 29280 Plouzané, France

## Contents of this File

- Table S1: Strongest acoustic events in swarm-1 (SL > 230 dB)
- Table S2: Strongest acoustic events in swarm-2 (SL > 230 dB)
- Figure S1: Error distribution improvements in the two picking iterations of swarm-1 events
- Figure S2: Error distribution improvements in the two picking iterations of swarm-2 events
- Figure S3: Analysis of swarm-2 events after 28 September- 07h06, 2018 event
- Figure S4: Analysis of swarm-2 events after 14 October- 12h32, 2018 event
- Figure S5: Detailed bathymetric maps of the swarm-1 and swarm-2 areas
- Figure S6: Distribution of swarm-1 events w.r.t. a reference point at west of it (showing an initial eastward propagation)

**Table S1.** List of the strongest acoustic events in swarm-1 (SL > 230 dB).

| Origin Time   | Latitude (°S) | Longitude (°E) | Source Level (dB) | Magnitude (mb) <sup>a</sup> |
|---------------|---------------|----------------|-------------------|-----------------------------|
| 10 July-08h44 | 31.667        | 58.506         | 231.82            | 5.1                         |
| 10 July-10h26 | 31.711        | 58.419         | 236.08            | 5.5                         |
| 10 July-16h05 | 31.700        | 58.460         | 234.65            | 5.7                         |
| 10 July-18h41 | 31.780        | 58.674         | 232.81            | 4.0                         |
| 10 July-23h28 | 31.661        | 58.770         | 232.84            | 5.2                         |
| 11 July-00h33 | 31.653        | 58.657         | 235.84            | 5.2                         |
| 11 July-02h22 | 31.744        | 58.570         | 231.14            | 4.8                         |
| 11 July-05h00 | 31.652        | 58.429         | 234.87            | 4.0                         |
| 12 July-11h14 | 31.559        | 58.123         | 231.95            | --                          |
| 13 July-01h20 | 31.561        | 58.126         | 232.47            | --                          |

<sup>a</sup> Only for events reported in the ISC catalogue.

**Table S2.** List of the strongest acoustic events in swarm-2 (SL > 230 dB).

| Origin Time        | Latitude (°S) | Longitude (°E) | Source Level (dB) | Magnitude (mb) <sup>a</sup> |
|--------------------|---------------|----------------|-------------------|-----------------------------|
| 28 September-05h56 | 26.736        | 67.789         | 230.41            | 4.9                         |
| 28 September-06h21 | 26.924        | 67.758         | 240.33            | 5.5                         |
| 28 September-07h06 | 26.929        | 67.741         | 239.14            | 5.6                         |
| 28 September-11h01 | 26.764        | 67.773         | 232.28            | 4.6                         |
| 01 October-04h07   | 26.806        | 67.284         | 240.08            | --                          |
| 01 October-04h17   | 26.978        | 67.723         | 234.24            | --                          |
| 01 October-04h21   | 26.905        | 67.869         | 232.76            | --                          |
| 01 October-07h21   | 26.649        | 67.675         | 232.46            | 5.3                         |
| 01 October-16h31   | 26.673        | 67.470         | 230.95            | --                          |
| 01 October-18h16   | 26.613        | 67.603         | 234.03            | 5.7                         |
| 02 October-01h22   | 26.392        | 66.887         | 232.10            | --                          |
| 04 October-13h00   | 26.355        | 67.803         | 230.76            | --                          |
| 04 October-13h06   | 26.397        | 67.912         | 231.07            | --                          |
| 05 October-17h58   | 26.903        | 67.476         | 238.11            | --                          |
| 06 October-10h36   | 27.012        | 68.024         | 230.84            | --                          |
| 11 October-00h12   | 26.254        | 68.186         | 230.27            | --                          |
| 14 October-15h44   | 26.651        | 67.512         | 232.38            | --                          |
| 14 October-04h57   | 26.805        | 67.922         | 240.21            | --                          |
| 14 October-12h32   | 26.603        | 67.457         | 240.79            | --                          |
| 14 October-12h53   | 26.729        | 68.034         | 239.98            | --                          |
| 14 October-16h18   | 26.711        | 67.931         | 235.57            | --                          |
| 15 October-08h09   | 26.712        | 67.318         | 230.12            | --                          |
| 15 October-23h34   | 26.567        | 67.518         | 230.20            | --                          |
| 18 October-22h53   | 26.851        | 67.785         | 237.07            | 4.9                         |

<sup>a</sup> Only for events reported in the ISC catalogue.

## Supplementary Figures

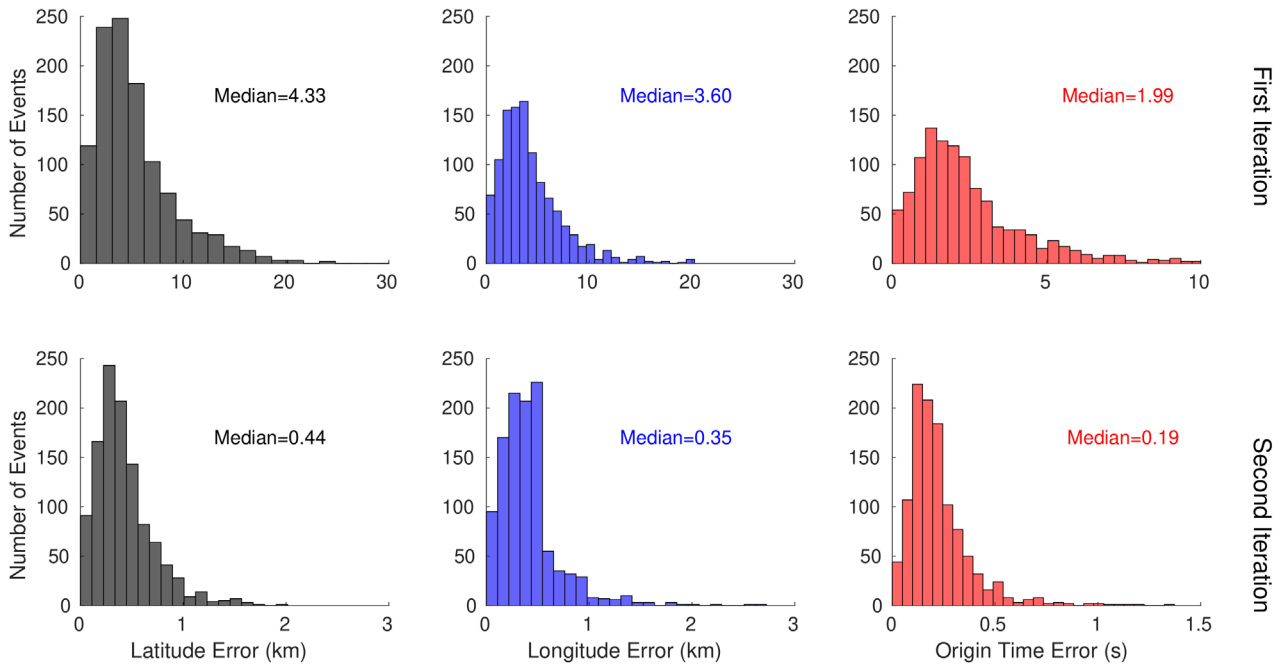

**Figure S1.** Improvements in the error distributions in location (latitude and longitude) and origin time for all hydroacoustic events from swarm-1 between the first iteration (initial picking, upper panel) and the second iteration (re-picking, lower panel).

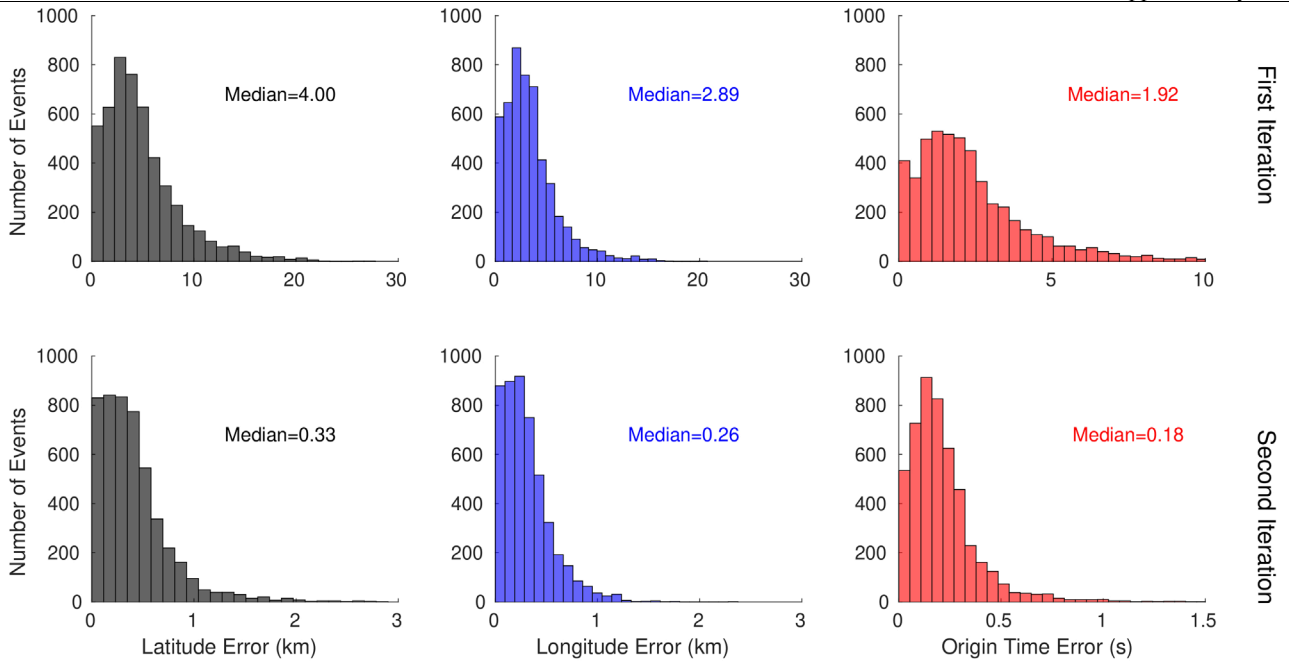

**Figure S2.** Improvements in the error distributions in location (latitude and longitude) and origin time for all hydroacoustic events from swarm-2 between the first iteration (initial picking, upper panel) and the second iteration (re-picking, lower panel).

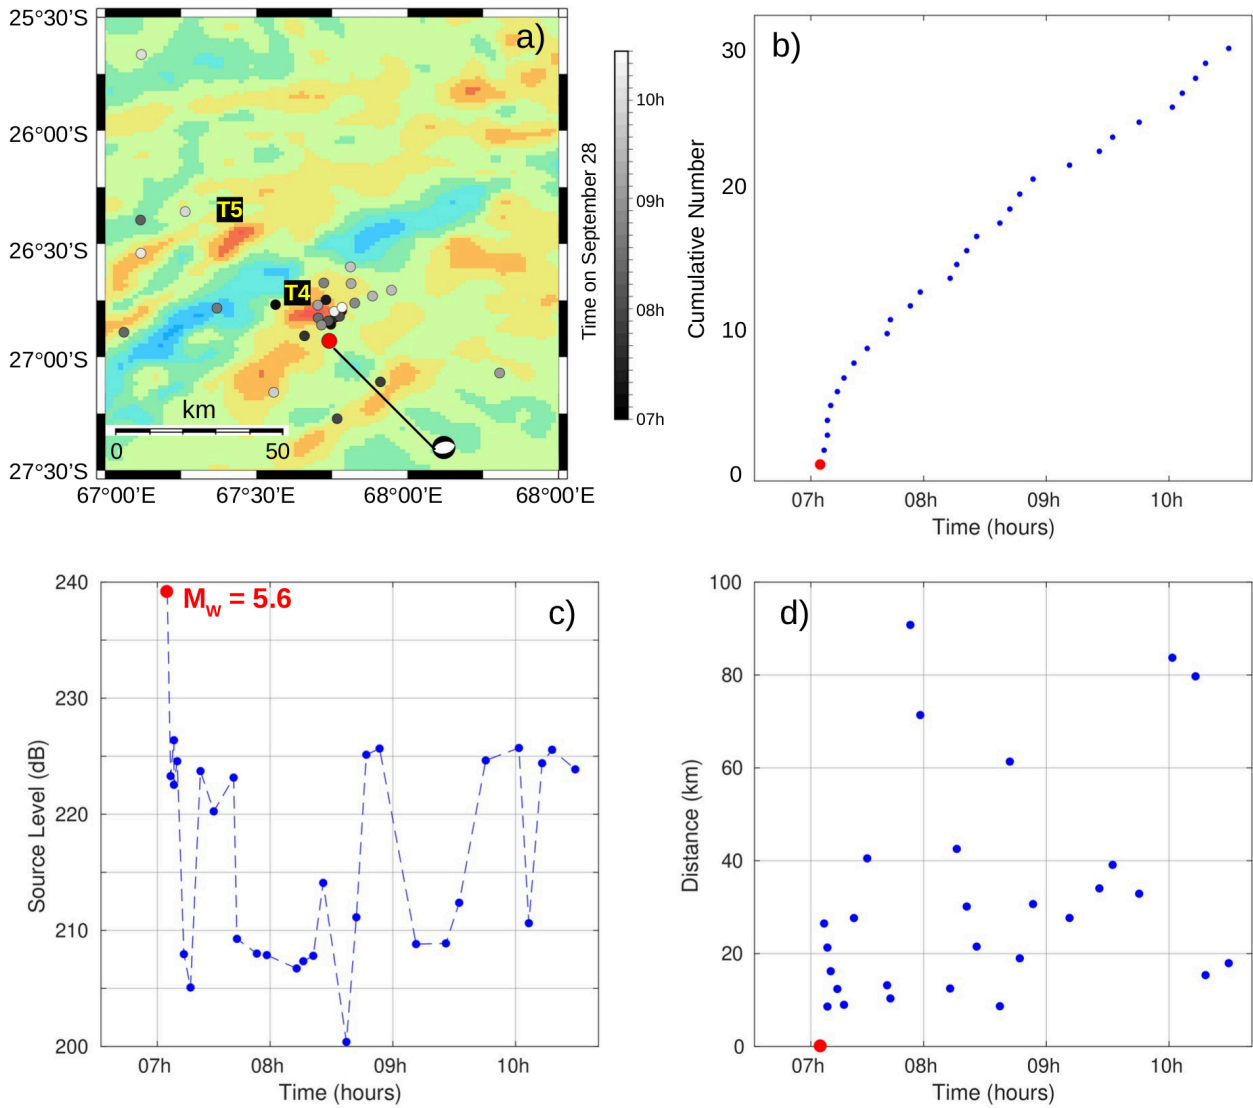

**Figure S3.** **a)** Location of the events that occurred after a  $M_w=5.6$  normal faulting event on 28 September, 2018 (red dot). T4 and T5 denotes the seamounts. Events are plotted according to their origin time (in gray colorscale). **b)** Cumulative Number of events after mainshock (red dot). **c)** Source Level of events shown in **a)**. **d)** Distance of events from the mainshock vs time. These distributions do not resemble to a classical tectonic mainshock-aftershocks sequence.

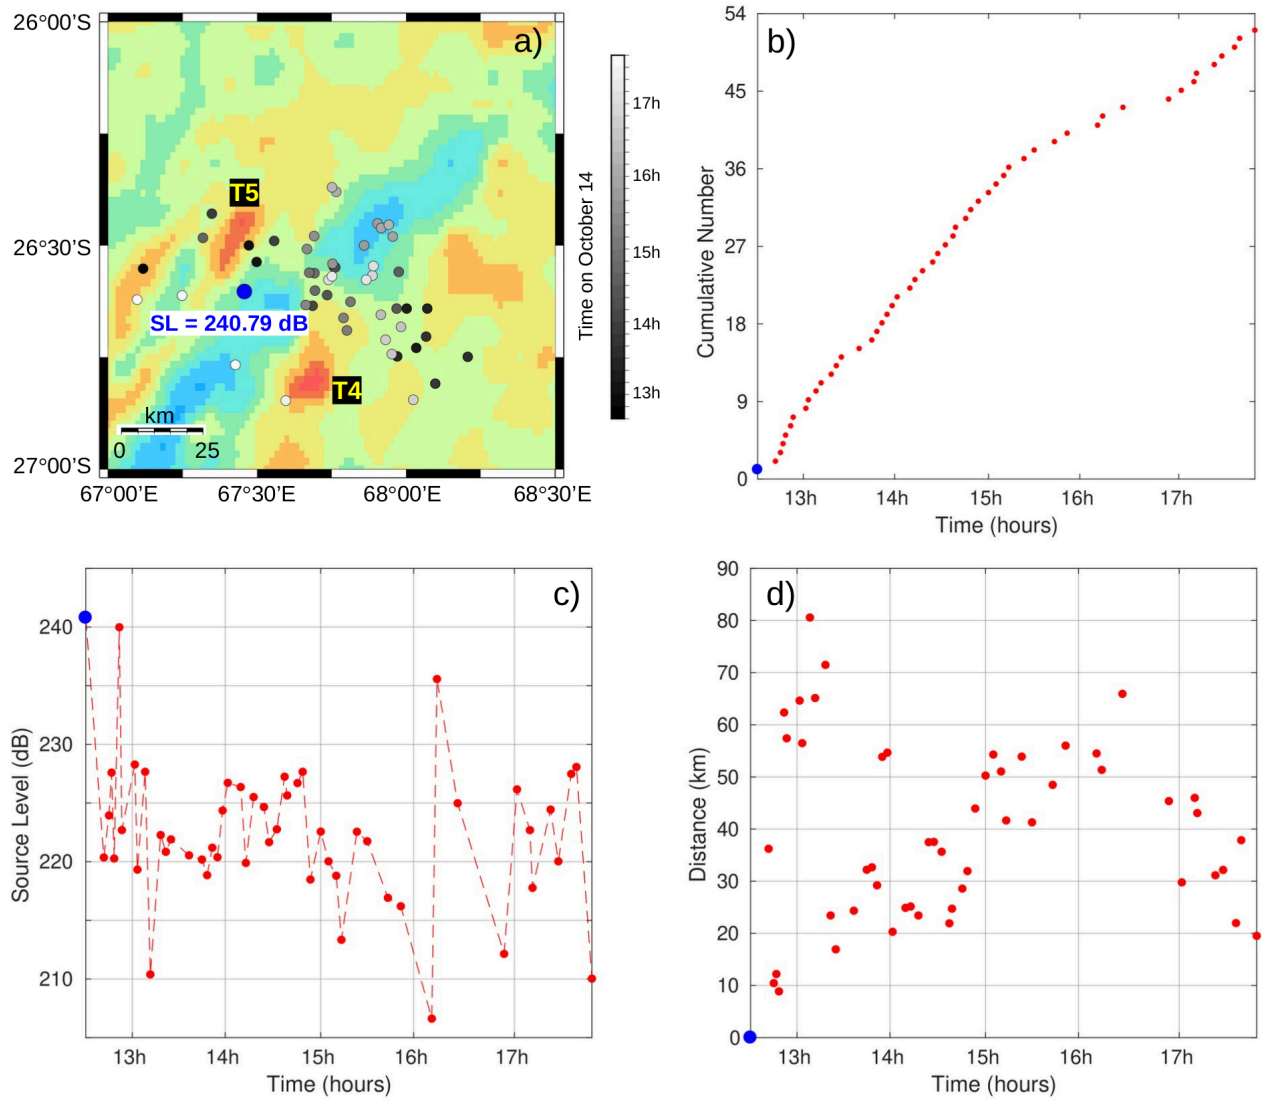

**Figure S4.** **a)** Location of the events that occurred after a strong event on 14 October, 2018 (SL = 240.79 dB; blue dot). T4 and T5 denotes the seamounts. Events are plotted according to their origin time (in gray colorscale). **b)** Cumulative Number of events after the 240.79 dB event. **c)** Source Level of events shown in a). **d)** Distance of events from the 240.79 dB event vs time. These distributions do not resemble to a classical tectonic mainshock-aftershocks sequence.

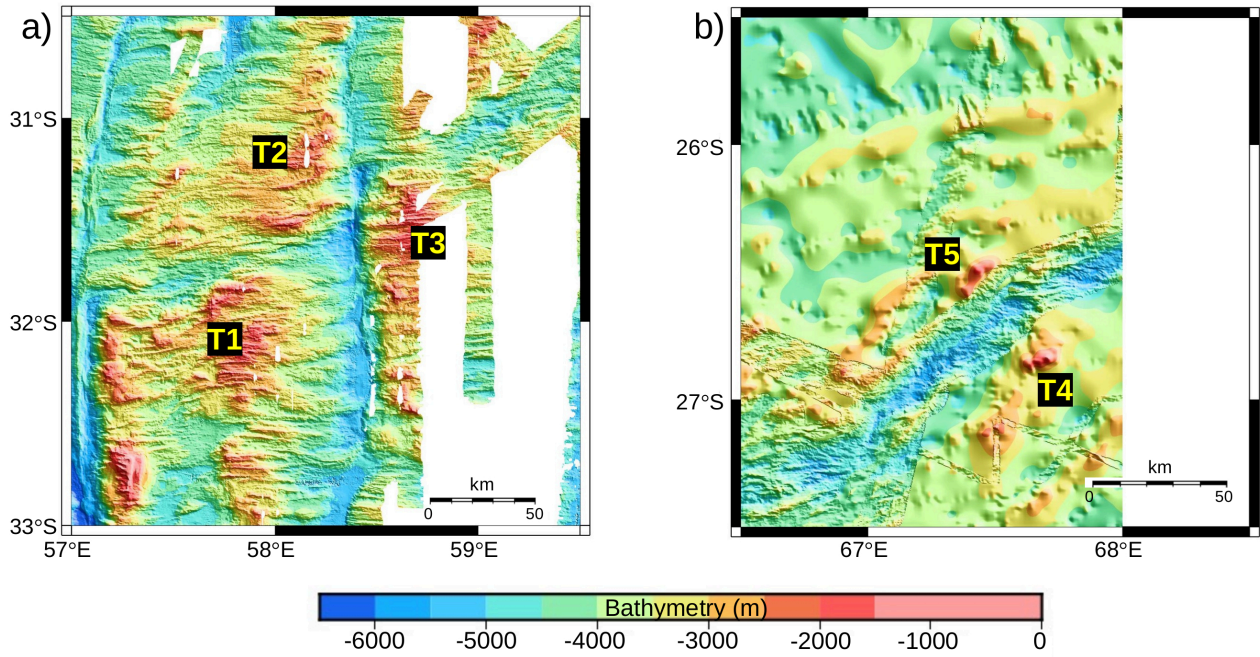

**Figure S5.** Detailed bathymetric maps of the swarm areas: **a)** For swarm-1; T1, T2 and T3 are three main local seamounts. **b)** For swarm-2; T4 and T5 shows two local seamounts on either side of the rift valley. Bathymetric grids are from [32].

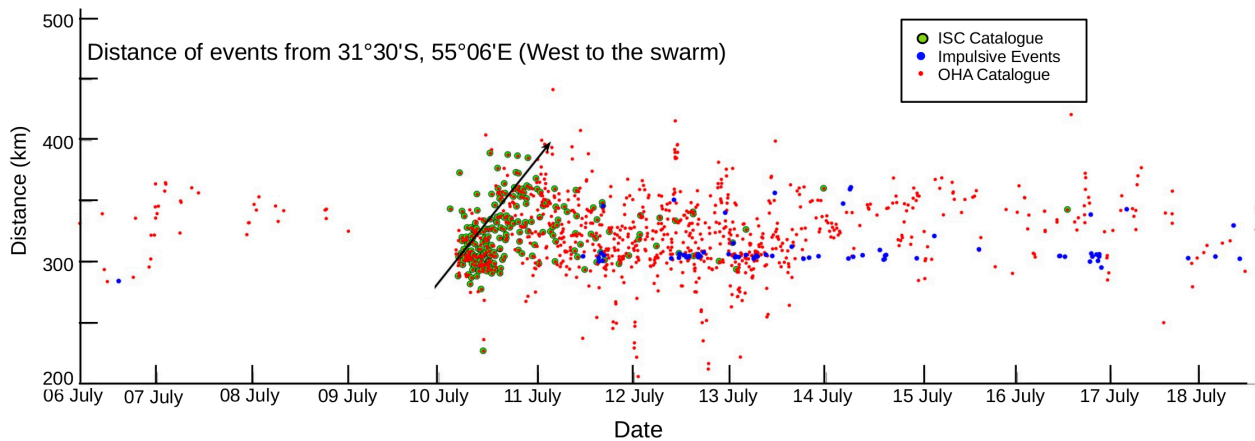

**Figure S6.** Distance of all hydroacoustic events of swarm-1 relative to an arbitrary reference point set at West (31°30'S, 55°06'E) from the center of swarm. All dots are hydroacoustic events (red); among them, blue dots are impulsive events and green outlines events reported in ISC catalogue. The black arrow shows the initial eastward direction of propagation of events.
